# Supplementary material for: Una seria llamada de atención
Source: Royal Society of Chemistry journal article supplement (doi:10.1039/c5dt00064e), 2004-01-01
Supplement: c5dt00064e1.pdf [file c5dt00064e1.pdf]

# Supporting Information

## Ligand Effects on the Electrochemical Behavior of $[\text{Fe}_2(\text{CO})_5(\text{L})\{\mu\text{-(SCH}_2)_2(\text{Ph})\text{P=O}\}]$ (L = $\text{PPh}_3$ , $\text{P(OEt)}_3$ ) Hydrogenase Model Complexes

*Laith R. Almazahreh,<sup>†</sup> Wolfgang Imhof,<sup>\*†‡</sup> Jean Talarmin,<sup>\*'£</sup> Philippe Schollhammer,<sup>\*'£</sup> Helmar  
Görls,<sup>†</sup> Mohammad El-khateeb,<sup>⊥</sup> and Wolfgang Weigand<sup>\*'†</sup>*

*<sup>†</sup>Institut für Anorganische und Analytische Chemie, Friedrich-Schiller-Universität Jena,  
Humboldtstrasse 8, D-07743 Jena, Germany,*

*<sup>‡</sup>Institut für Integrierte Naturwissenschaften, Universität Koblenz-Landau, Universitätsstr. 1, D-  
56070 Koblenz, Germany,*

*<sup>£</sup>UMR CNRS 6521, , Université de Bretagne Occidentale, 6 avenue Le Gorgeu,, C.S. 93837,  
29238 Brest-Cedex, France and*

*<sup>⊥</sup>Chemistry Department, Jordan University of Science and Technology, 22110 Irbid, Jordan.*

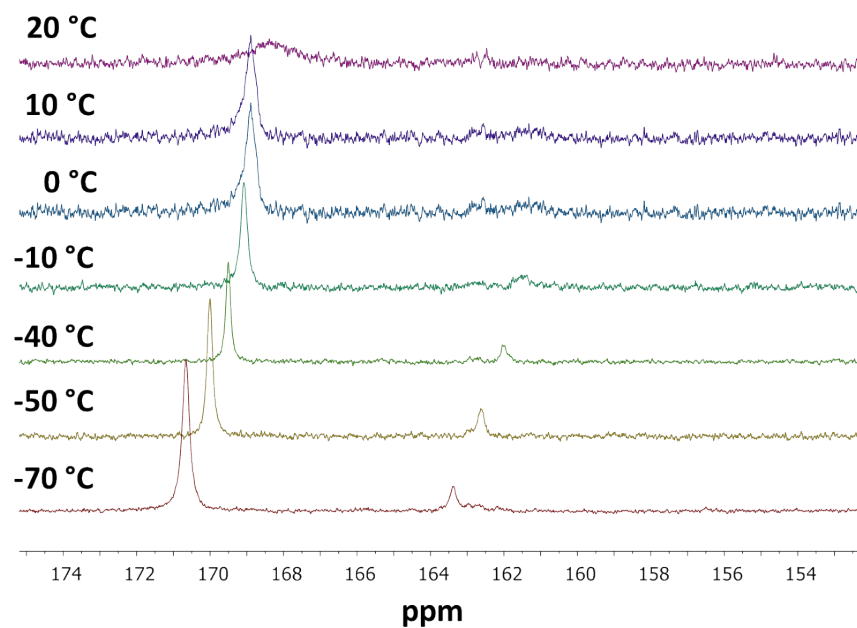

**Figure S1.** Variable temperature  $^{31}\text{P}\{^1\text{H}\}$  NMR spectra at 400 MHz of complex 3 in MeOD.

Only the resonance due to the  $\text{P}(\text{OEt})_3$  ligand is shown.

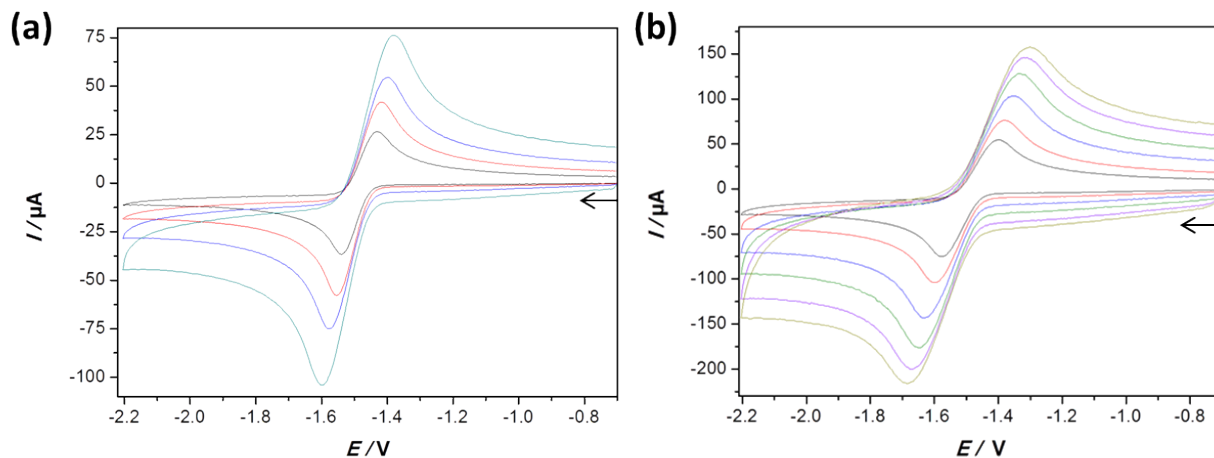

**Figure S2.** Cyclic voltammetry of 0.65 mM complex **1** ( $\text{CH}_2\text{Cl}_2/\text{NBu}_4\text{PF}_6$  solution) at scan rates ( $\text{V}\cdot\text{s}^{-1}$ ) = (a) 0.2 (black), 0.5 (red), 1 (blue), 2 (green), (b) 1 (black), 2 (red), 4 (blue), 6 (green), 8 (violet) and 10 (dark yellow).  $E$  is in V against the ferrocenium/ferrocene couple. The arrows indicate the scan direction.

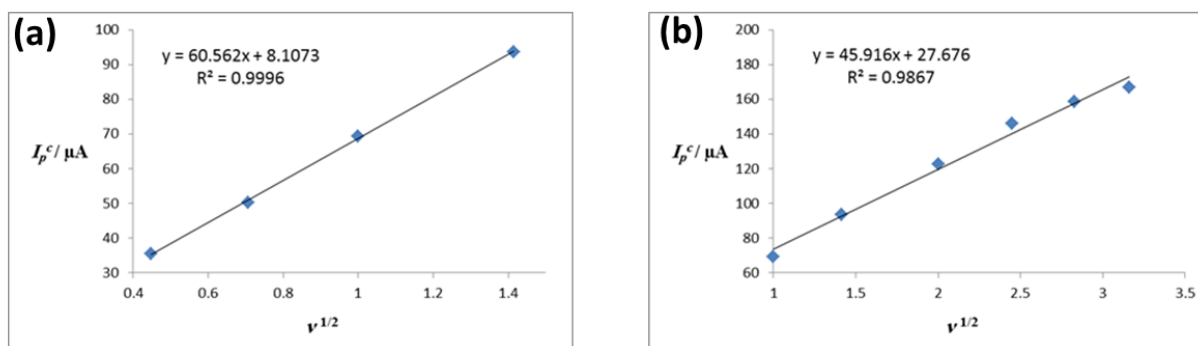

**Figure S3.** Plots of the cathodic current ( $I_p^c$ ) versus square root of scan rate ( $\nu^{1/2}/(\text{V}\cdot\text{s}^{-1})^{1/2}$ ) obtained from the cyclic voltammetry of complex **1** in (a) Figures S2a and (b) Figure S2b.

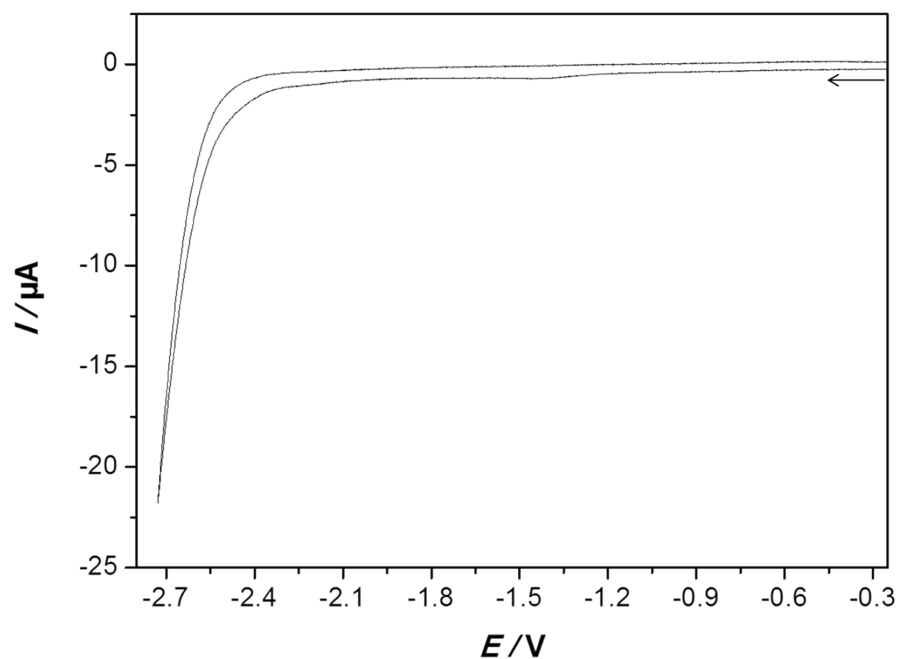

**Figure S4.** Cyclic voltammetry of 3.13 mM  $\text{O}=\text{P}(\text{Ph})(\text{CH}_2\text{Cl})_2$  ( $\text{CH}_2\text{Cl}_2/\text{NBu}_4\text{PF}_6$  solution) at  $0.2 \text{ V}\cdot\text{s}^{-1}$ .  $E$  is in V against the ferrocenium/ferrocene couple. Glassy carbon disk ( $d = 1.6 \text{ mm}$ ). The arrows indicate the scan direction.

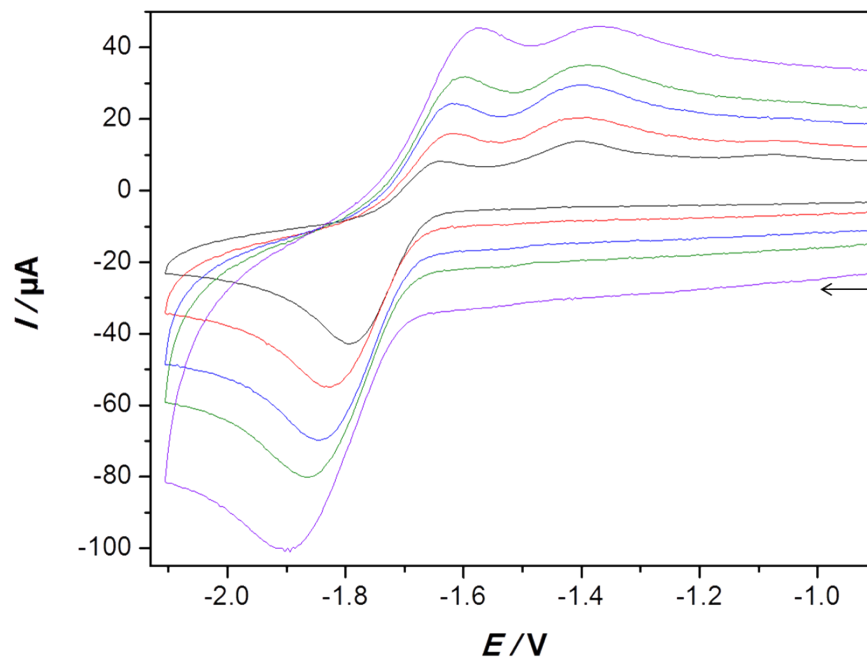

**Figure S5.** Cyclic voltammetry of 0.408 mM complex **2** ( $\text{CH}_2\text{Cl}_2/\text{NBu}_4\text{PF}_6$  solution) at scan rates ( $\text{V}\cdot\text{s}^{-1}$ ) equal to 1 (black), 2 (red), 3 (blue), 4 (green) and 6 (purple).  $E$  is in V against the ferrocenium/ferrocene couple. The arrow indicates the scan direction.

**Table S1.** Results of DFT calculations of **5** and **6** in the neutral, monoanionic and dianionic state as well as P1, P2 and the reduced species derived from them (See the paragraph discussing the structure of **P** and Figures S10 and S11).

|                        | $E_T$ [a.u.] | $NImag$ | Stabilization [kJ·mol <sup>-1</sup> ] |
|------------------------|--------------|---------|---------------------------------------|
| <b>5</b>               | -2799.196753 | 1*      | 0                                     |
| <b>5<sup>-</sup></b>   | -2799.260484 | 1*      | -167.3                                |
| <b>5<sup>2-</sup></b>  | -2799.206017 | 0       | -24.3                                 |
| <b>5a<sup>2-</sup></b> | -2799.225453 | 0       | -75.4                                 |
| <b>5b<sup>2-</sup></b> | -2799.212985 | 0       | -42.6                                 |
| <b>6</b>               | -3024.944206 | 0       | 0                                     |
| <b>6<sup>-</sup></b>   | -3025.014420 | 0       | -184.3                                |
| <b>6<sup>2-</sup></b>  | -3024.951196 | 0       | -18.4                                 |
| <b>6a<sup>2-</sup></b> | -3024.963479 | 0       | -50.6                                 |
| <b>6b<sup>2-</sup></b> | -3024.956772 | 0       | -33.0                                 |
| <b>P1</b>              | -3256.248118 | 0       |                                       |
| <b>P2</b>              | -3256.238331 | 0       |                                       |
| <b>P1<sup>-</sup></b>  | -3256.269607 | 0       |                                       |
| <b>P1<sup>0</sup></b>  | -3256.190197 | 0       |                                       |
| <b>P2<sup>0</sup></b>  | -3256.182587 | 0       |                                       |

\* One imaginary frequency corresponds to the rotation of the PMe<sub>3</sub> ligand with respect to the [Fe<sub>2</sub>S<sub>2</sub>] cluster core and is of very low intensity.

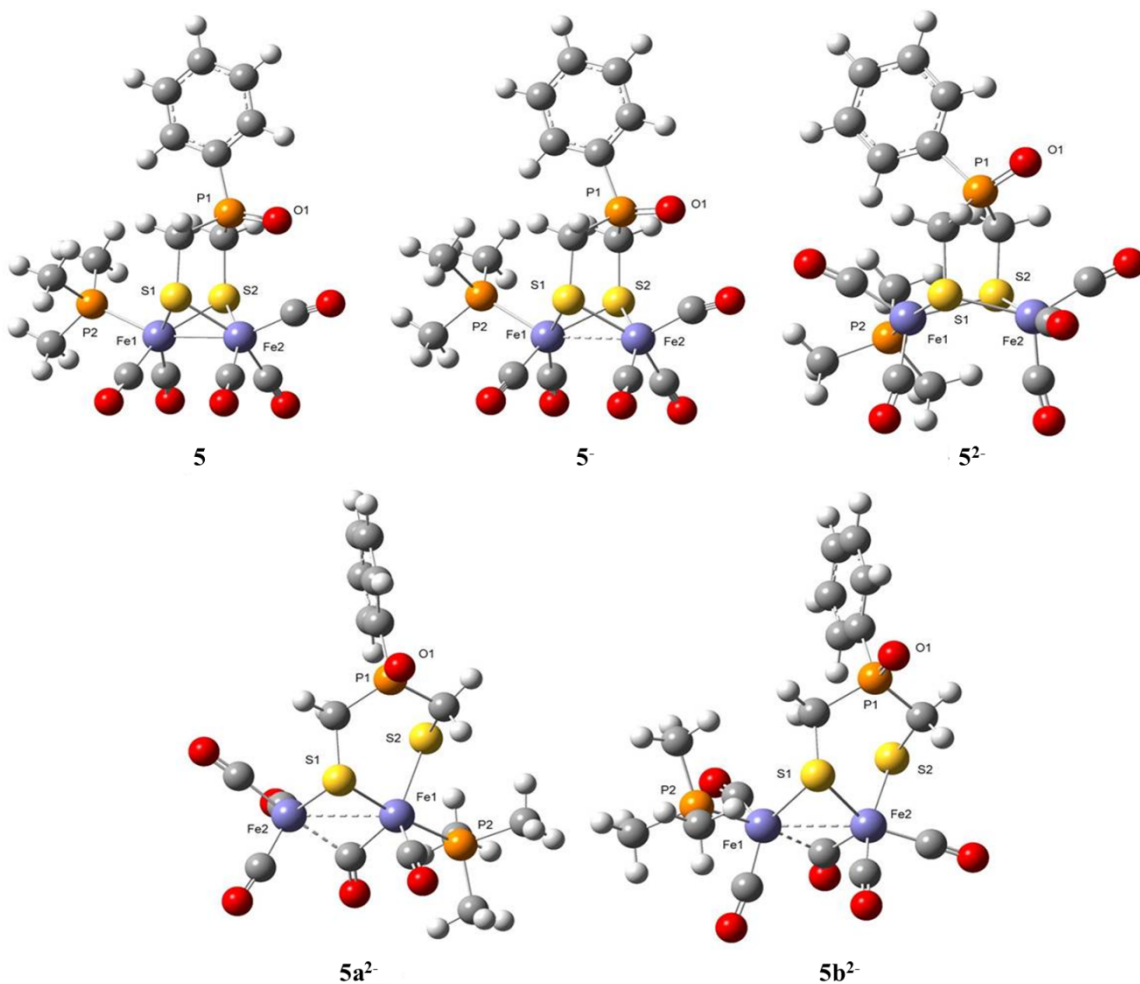

**Figure S6.** Calculated molecular structures and selected bond lengths [pm] of **5**: Fe1-Fe2 249.7, Fe1-S1 234.0, Fe1-S2 234.4, Fe2-S1 234.7, Fe2-S2 234.3, Fe1-P2 226.3, P1-O1 149.7; **5<sup>-</sup>**: Fe1-Fe2 274.0, Fe1-S1 237.8, Fe1-S2 237.9, Fe2-S1 240.0, Fe2-S2 239.7, Fe1-P2 234.1, P1-O1 150.0; **5<sup>2-</sup>**: Fe1-Fe2 350.7, Fe1-S1 236.9, Fe1-S2 244.7, Fe2-S1 242.2, Fe2-S2 239.9, Fe1-P2 220.0, P1-O1 151.2; **5a<sup>2-</sup>**: Fe1-Fe2 265.2, Fe1-S1 231.1, Fe1-S2 254.3, Fe2-S1 237.9, Fe1-P2 224.0, P1-O1 151.5; **5b<sup>2-</sup>**: Fe1-Fe2 271.8, Fe1-S1 244.0, Fe2-S1 234.7, Fe2-S2 245.1, Fe1-P2 220.2, P1-O1 151.6.

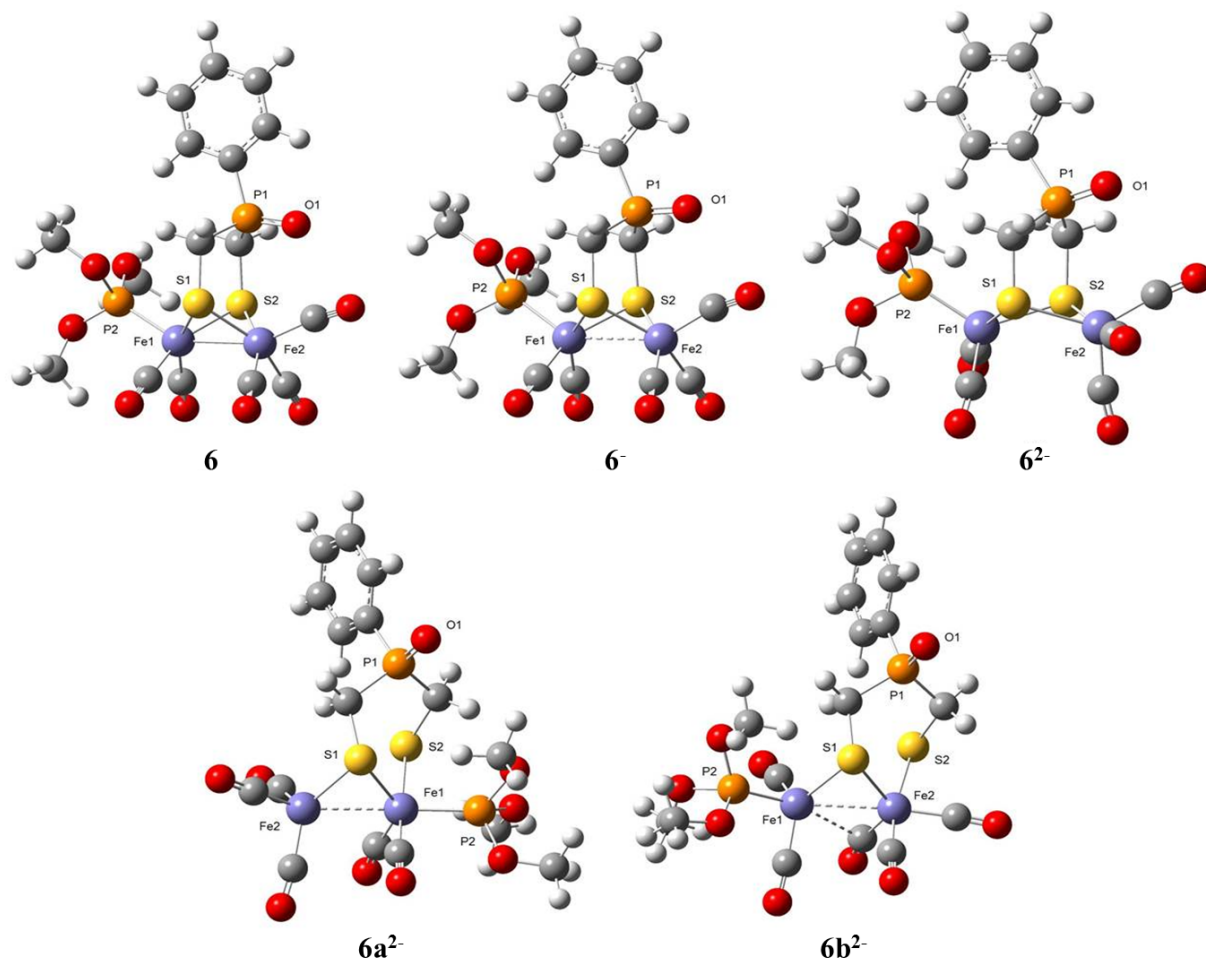

**Figure S7.** Calculated molecular structures and selected bond lengths [pm] of **6**: Fe1-Fe2 250.6, Fe1-S1 232.6, Fe1-S2 233.1, Fe2-S1 233.1, Fe2-S2 233.3, Fe1-P2 219.0, P1-O1 149.8; **6<sup>-</sup>**: Fe1-Fe2 276.3, Fe1-S1 236.9, Fe1-S2 237.8, Fe2-S1 237.7, Fe2-S2 238.4, Fe1-P2 219.8, P1-O1 150.2; **6<sup>2-</sup>**: Fe1-Fe2 344.7, Fe1-S1 240.7, Fe1-S2 240.4, Fe2-S1 244.0, Fe2-S2 239.7, Fe1-P2 210.0, P1-O1 150.8; **6a<sup>2-</sup>**: Fe1-Fe2 272.5, Fe1-S1 236.7, Fe1-S2 245.7, Fe2-S1 232.9, Fe1-P2 214.7, P1-O1 151.6; **6b<sup>2-</sup>**: Fe1-Fe2 273.9, Fe1-S1 234.7, Fe2-S1 235.9, Fe2-S2 244.6, Fe1-P2 211.1, P1-O1 151.6.



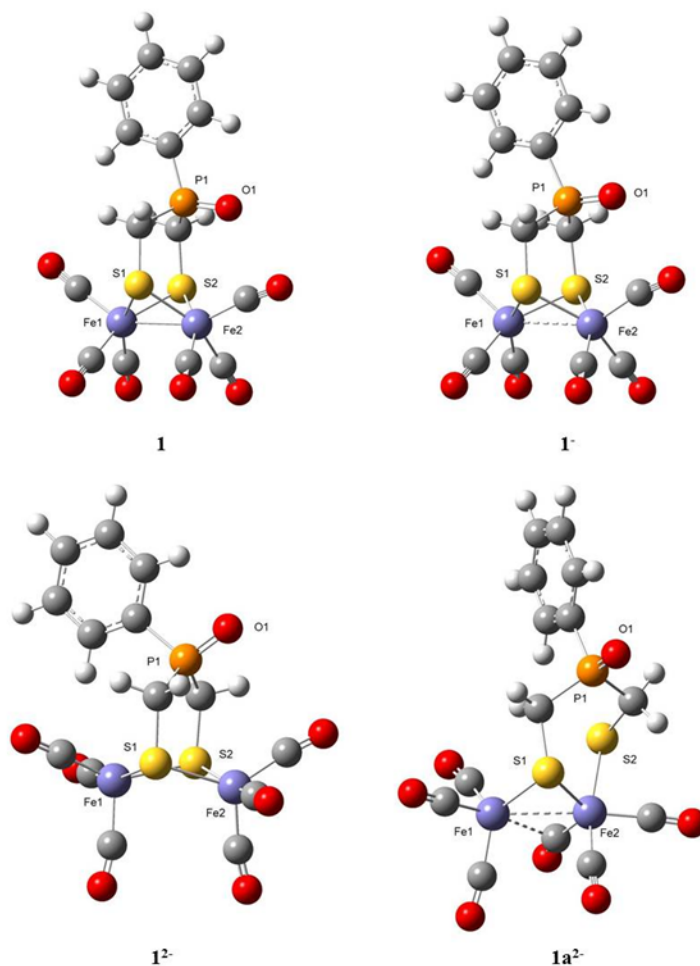

**Figure S8.** Calculated molecular structures and selected bond lengths [pm] of **1**: Calculated molecular structures and selected bond lengths [pm] of **1**: HF = -2451.489710 a.u.,  $NImag = 0$ , Fe1-Fe2 251.2, Fe1-S1 231.9, Fe1-S2 231.9, Fe2-S1 232.7, Fe2-S2 232.7, P1-O1 149.7; **1**<sup>•</sup>: HF = -2451.571974 a.u. (-216.0 kJ·mol<sup>-1</sup> relative to **1**),  $NImag = 0$ , Fe1-Fe2 281.0, Fe1-S1 237.3, Fe1-S2 237.3, Fe2-S1 236.9, Fe2-S2 236.9, P1-O1 150.1; **1**<sup>2•</sup>: HF = -2451.521008 a.u. (-82.2 kJ·mol<sup>-1</sup> relative to **1**),  $NImag = 0$ , Fe1-Fe2 352.7, Fe1-S1 239.3, Fe1-S2 240.8, Fe2-S1 241.3, Fe2-S2 239.5, P1-O1 151.2; **1a**<sup>2•</sup>: HF = -2451.528961 a.u. (-13.1 kJ·mol<sup>-1</sup> relative to **1**),  $NImag = 0$ , Fe1-Fe2 273.0, Fe1-S1 234.8, Fe2-S1 235.9, Fe2-S2 244.2, P1-O1 151.5.

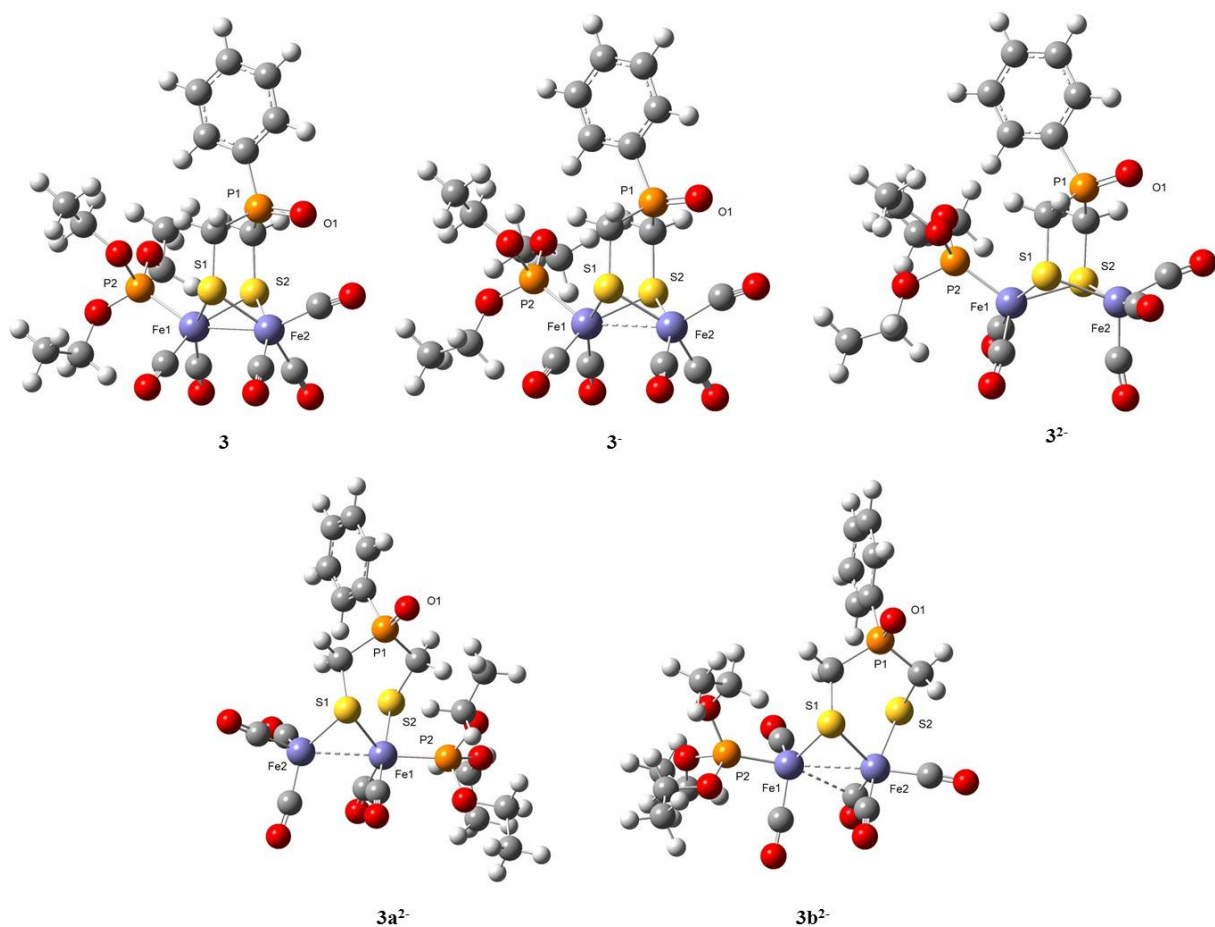

**Figure S9.** Calculated molecular structures and selected bond lengths [pm] of **3**: HF = -3142.854678 a.u., *NImag* = 0, Fe1-Fe2 251.7, Fe1-S1 232.6, Fe1-S2 232.9, Fe2-S1 233.0, Fe2-S2 232.9, Fe1-P2 220.8, P1-O1 150.0; **3<sup>-</sup>**: HF = -3142.922307 a.u. (-177.6 kJ·mol<sup>-1</sup> relative to **3**), *NImag* = 0, Fe1-Fe2 278.5, Fe1-S1 236.3, Fe1-S2 237.1, Fe2-S1 237.9, Fe2-S2 237.6, Fe1-P2 221.9, P1-O1 150.3; **3<sup>2-</sup>**: HF = -3142.860589 a.u. (-15.5 kJ·mol<sup>-1</sup> relative to **3**), *NImag* = 0, Fe1-Fe2 344.8, Fe1-S1 240.9, Fe1-S2 241.1, Fe2-S1 244.5, Fe2-S2 239.7, Fe1-P2 210.8, P1-O1 151.0; **3a<sup>2-</sup>**: HF = -3142.872079 a.u. (-45.7 kJ·mol<sup>-1</sup> relative to **3**), *NImag* = 0, Fe1-Fe2 272.6, Fe1-S1 236.7, Fe1-S2 245.8, Fe2-S1 232.6, Fe1-P2 215.3, P1-O1 151.7; **3b<sup>2-</sup>**: HF = -3142.867376 a.u. (-33.3 kJ·mol<sup>-1</sup> relative to **3**), *NImag* = 0, Fe1-Fe2 274.3, Fe1-S1 235.1, Fe2-S1 236.4, Fe2-S2 244.7, Fe1-P2 211.7, P1-O1 151.5.

## Structure of **P**.

Another important question that arose during the electrochemical investigations was the molecular structure of compound **P**, which is formed by the reaction of the doubly reduced form of **3** with CO. We therefore calculated compounds with one additional CO ligand starting either from  $\mathbf{3}^{2-}$  or  $\mathbf{3a}^{2-}$ . In the case of  $\mathbf{3a}^{2-}$  as the substrate, we used a compound with two bridging CO ligands as the starting point for geometry optimization. Nevertheless, a convergence in the calculations was only reached after significant structural changes in the cluster core ending up with a situation in which a Lewis acid-Lewis base adduct, namely **P1**, consisting of a trigonal pyramidal  $[\text{Fe}(\text{CO})_4]$  and a square planar  $\{\text{Fe}(\text{CO})_2(\text{P}(\text{OEt})_3)[(\text{SCH}_2)_2(\text{Ph})\text{P}=\text{O}]\}$  fragment linked by an iron iron contact is observed (Figure S10). By forming this adduct, the coordination geometry of the first iron is completed to a distorted trigonal bipyramidal coordination environment and the second iron then shows a distorted octahedral geometry. The iron-iron interaction is quite weak with a bond length of 312.5 pm. Perhaps this long distance shows how the compound might decompose. If on the other hand the thermodynamically less stable dianion  $\mathbf{3}^{2-}$  is used as the substrate for CO addition, one of the Fe-S bonds in the symmetrical  $[\text{Fe}_2\text{S}_2]$  core is broken upon geometry optimization. The resulting structure **P2** still shows one bridging sulfur that coordinates a  $[\text{Fe}(\text{CO})_4]$  and a  $\{\text{Fe}(\text{CO})_2(\text{P}(\text{OEt})_3)[(\text{SCH}_2)_2(\text{Ph})\text{P}=\text{O}]\}$  fragment (Figure S10). Both iron atoms exhibit trigonal bipyramidal coordination environments. The overall reactions for the formation of **P1** and **P2** from the respective starting compounds are slightly exothermic with an enthalpy of  $-33.9 \text{ kJ}\cdot\text{mol}^{-1}$  (**P1**) and  $-38.4 \text{ kJ}\cdot\text{mol}^{-1}$  (**P2**). Nevertheless, **P1** is  $25.7 \text{ kJ}\cdot\text{mol}^{-1}$  more stable than **P2** if only those calculated compounds are compared. Table S1 above shows the DFT total energies  $E_T$  and the number of imaginary

frequencies for all stationary points calculated for **P1** and **P2** as well as selected calculated bond lengths.

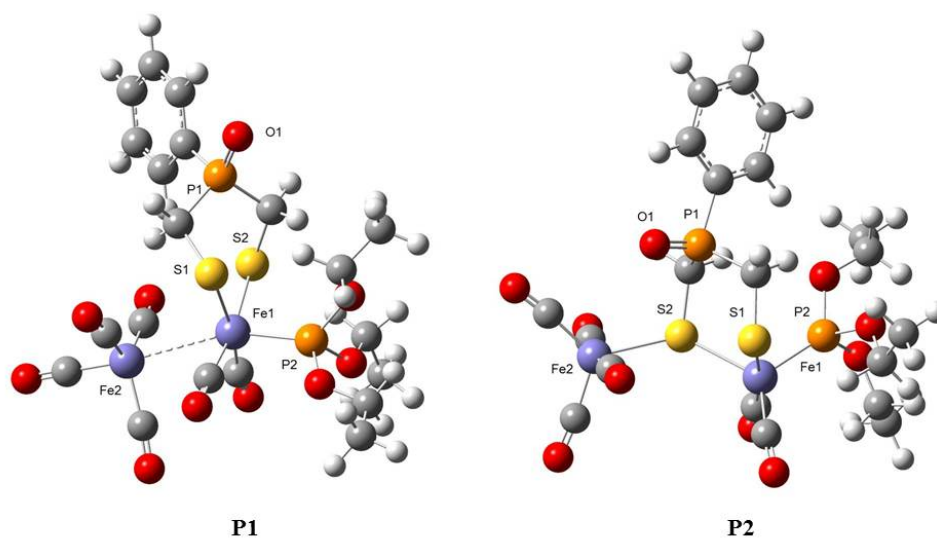

**Figure S10.** Calculated molecular structures and selected bond lengths [pm] of dianionic species **P1**: Fe1-Fe2 312.5, Fe1-S1 242.9, Fe1-S2 243.4, Fe1-P2 219.5, P1-O1 151.8; **P2**: Fe1-Fe2 451.3, Fe1-S1 241.2, Fe1-S2 248.5, Fe2-S2 243.9, Fe1-P2 212.1, P1-O1 150.7.

It has also been shown by cyclic voltammetry (Figure 6 and Scheme 3) that compound **P** undergoes a reversible oxidation process. We therefore calculated both monoanionic and neutral species with the calculated structures of **P1** and **P2** as the starting geometries. Whereas the geometry optimization of **P2** after one-electron oxidation did not converge, the corresponding monoanionic species from **P1** could be calculated. In both cases neutral compounds that would be obtained from the loss of two electrons from **P1** or **P2**, respectively, could be calculated. The corresponding structures are depicted in Figure S11. The monoanion derived from **P1** shows the

same connectivity pattern although it is obvious that upon loss of one electron the iron-iron bond length as well as the distances of Fe1 towards the coordinating sulfur atoms are shortened. If another electron is removed, electron demand in the cluster core is compensated by one of the sulfur atoms moving into a bridging position again. In addition, the iron-iron distance is further diminished. The same trend is observed if **P2** is oxidized. If two electrons are removed the iron atoms are again moved into close proximity to each other resulting in the same  $[\text{Fe}_2\text{S}_2]$  cluster core for **P2<sup>0</sup>** as in **P1<sup>0</sup>**. Both compounds are therefore isomers, which just differ in the dihedral angle of the  $\text{Fe}(\text{CO})_4$  group with respect to the rest of the molecule as well as in the conformation of the six-membered  $\text{FeS}_2\text{C}_2\text{P}$  ring. In summary, the addition of CO to the reduced species followed by oxidation of the resulting cluster compounds **P1** and **P2** results in the formation of compounds with the same connectivity as it has been observed for **3a<sup>2-</sup>** and **3b<sup>2-</sup>**. As it is expected from the Wade-Mingos rules, the composition of a transition metal cluster compound is determined by the number of electrons in the cluster irrespective whether electrons are provided by additional ligands (**P1<sup>0</sup>**, **P2<sup>0</sup>**) or by reduction (**3a<sup>2-</sup>**, **3b<sup>2-</sup>**).

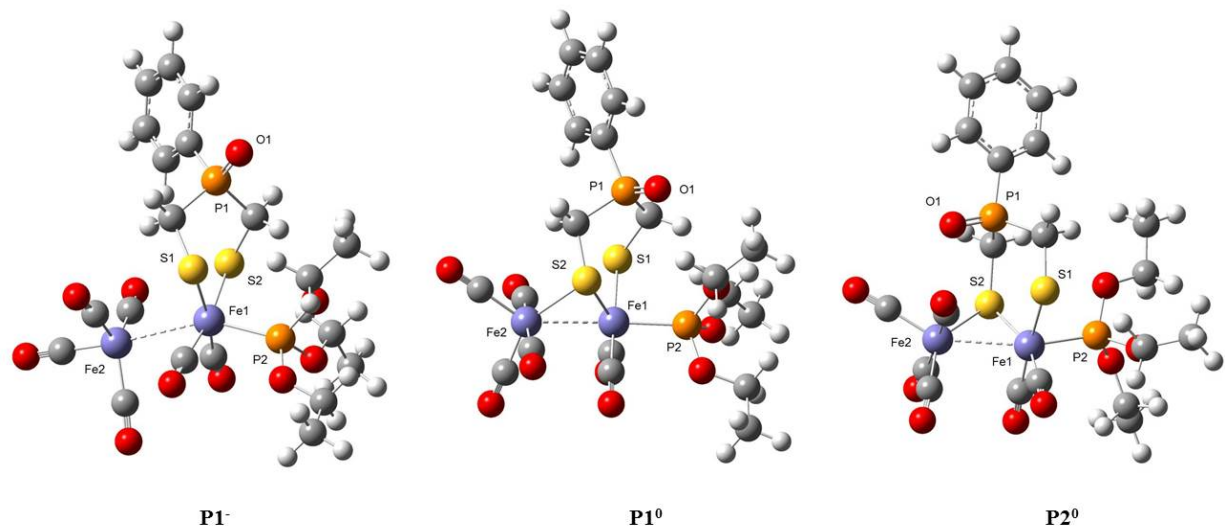

**Figure S11.** Calculated molecular structures and selected bond lengths of **P1<sup>-</sup>**: Fe1-Fe2 303.1, Fe1-S1 235.9, Fe1-S2 236.1, Fe1-P2 228.4, P1-O1 151.0; **P1<sup>0</sup>**: Fe1-Fe2 283.6, Fe1-S1 240.3, Fe1-S2 230.1, Fe2-S2 235.8, Fe1-P1 223.1, P1-O1 150.6; **P2<sup>0</sup>**: Fe1-Fe2 282.4, Fe1-S1 240.0, Fe1-S2 227.3, Fe2-S2 235.7, Fe1-P1 221.2, P1-O1 150.2.



|    |    |   |   |   |   |   |
|----|----|---|---|---|---|---|
| 3  | 11 | 1 | 0 | 0 | 0 | 0 |
| 7  | 12 | 4 | 0 | 0 | 0 | 0 |
| 7  | 13 | 4 | 0 | 0 | 0 | 0 |
| 12 | 14 | 4 | 0 | 0 | 0 | 0 |
| 12 | 15 | 1 | 0 | 0 | 0 | 0 |
| 13 | 16 | 4 | 0 | 0 | 0 | 0 |
| 13 | 17 | 1 | 0 | 0 | 0 | 0 |
| 14 | 18 | 4 | 0 | 0 | 0 | 0 |
| 14 | 19 | 1 | 0 | 0 | 0 | 0 |
| 16 | 18 | 4 | 0 | 0 | 0 | 0 |
| 16 | 20 | 1 | 0 | 0 | 0 | 0 |
| 18 | 21 | 1 | 0 | 0 | 0 | 0 |
| 22 | 23 | 1 | 0 | 0 | 0 | 0 |
| 22 | 24 | 1 | 0 | 0 | 0 | 0 |
| 22 | 25 | 1 | 0 | 0 | 0 | 0 |
| 23 | 26 | 3 | 0 | 0 | 0 | 0 |
| 24 | 27 | 3 | 0 | 0 | 0 | 0 |
| 25 | 28 | 3 | 0 | 0 | 0 | 0 |
| 29 | 30 | 1 | 0 | 0 | 0 | 0 |
| 29 | 31 | 1 | 0 | 0 | 0 | 0 |
| 29 | 32 | 1 | 0 | 0 | 0 | 0 |
| 30 | 33 | 3 | 0 | 0 | 0 | 0 |
| 31 | 34 | 3 | 0 | 0 | 0 | 0 |
| 32 | 35 | 3 | 0 | 0 | 0 | 0 |





|    |    |   |   |   |   |   |
|----|----|---|---|---|---|---|
| 5  | 13 | 1 | 0 | 0 | 0 | 0 |
| 5  | 16 | 1 | 0 | 0 | 0 | 0 |
| 5  | 19 | 1 | 0 | 0 | 0 | 0 |
| 7  | 30 | 3 | 0 | 0 | 0 | 0 |
| 8  | 31 | 3 | 0 | 0 | 0 | 0 |
| 9  | 32 | 3 | 0 | 0 | 0 | 0 |
| 10 | 33 | 3 | 0 | 0 | 0 | 0 |
| 11 | 34 | 3 | 0 | 0 | 0 | 0 |
| 12 | 35 | 2 | 0 | 0 | 0 | 0 |
| 13 | 14 | 1 | 0 | 0 | 0 | 0 |
| 13 | 15 | 1 | 0 | 0 | 0 | 0 |
| 16 | 17 | 1 | 0 | 0 | 0 | 0 |
| 16 | 18 | 1 | 0 | 0 | 0 | 0 |
| 19 | 20 | 4 | 0 | 0 | 0 | 0 |
| 19 | 28 | 4 | 0 | 0 | 0 | 0 |
| 20 | 21 | 1 | 0 | 0 | 0 | 0 |
| 20 | 22 | 4 | 0 | 0 | 0 | 0 |
| 22 | 23 | 1 | 0 | 0 | 0 | 0 |
| 22 | 24 | 4 | 0 | 0 | 0 | 0 |
| 24 | 25 | 1 | 0 | 0 | 0 | 0 |
| 24 | 26 | 4 | 0 | 0 | 0 | 0 |
| 26 | 27 | 1 | 0 | 0 | 0 | 0 |
| 26 | 28 | 4 | 0 | 0 | 0 | 0 |
| 28 | 29 | 1 | 0 | 0 | 0 | 0 |



|    |    |   |   |   |   |   |
|----|----|---|---|---|---|---|
| 3  | 11 | 1 | 0 | 0 | 0 | 0 |
| 7  | 12 | 4 | 0 | 0 | 0 | 0 |
| 7  | 13 | 4 | 0 | 0 | 0 | 0 |
| 12 | 14 | 4 | 0 | 0 | 0 | 0 |
| 12 | 15 | 1 | 0 | 0 | 0 | 0 |
| 13 | 16 | 4 | 0 | 0 | 0 | 0 |
| 13 | 17 | 1 | 0 | 0 | 0 | 0 |
| 14 | 18 | 4 | 0 | 0 | 0 | 0 |
| 14 | 19 | 1 | 0 | 0 | 0 | 0 |
| 16 | 18 | 4 | 0 | 0 | 0 | 0 |
| 16 | 20 | 1 | 0 | 0 | 0 | 0 |
| 18 | 21 | 1 | 0 | 0 | 0 | 0 |
| 22 | 23 | 1 | 0 | 0 | 0 | 0 |
| 22 | 24 | 1 | 0 | 0 | 0 | 0 |
| 22 | 25 | 1 | 0 | 0 | 0 | 0 |
| 23 | 26 | 2 | 0 | 0 | 0 | 0 |
| 24 | 27 | 2 | 0 | 0 | 0 | 0 |
| 25 | 28 | 2 | 0 | 0 | 0 | 0 |
| 29 | 30 | 1 | 0 | 0 | 0 | 0 |
| 29 | 31 | 1 | 0 | 0 | 0 | 0 |
| 29 | 32 | 1 | 0 | 0 | 0 | 0 |
| 30 | 33 | 2 | 0 | 0 | 0 | 0 |
| 31 | 34 | 2 | 0 | 0 | 0 | 0 |
| 32 | 35 | 2 | 0 | 0 | 0 | 0 |



|    |    |   |   |   |   |   |
|----|----|---|---|---|---|---|
| 3  | 11 | 1 | 0 | 0 | 0 | 0 |
| 7  | 12 | 4 | 0 | 0 | 0 | 0 |
| 7  | 13 | 4 | 0 | 0 | 0 | 0 |
| 12 | 14 | 4 | 0 | 0 | 0 | 0 |
| 12 | 15 | 1 | 0 | 0 | 0 | 0 |
| 13 | 16 | 4 | 0 | 0 | 0 | 0 |
| 13 | 17 | 1 | 0 | 0 | 0 | 0 |
| 14 | 18 | 4 | 0 | 0 | 0 | 0 |
| 14 | 19 | 1 | 0 | 0 | 0 | 0 |
| 16 | 18 | 4 | 0 | 0 | 0 | 0 |
| 16 | 20 | 1 | 0 | 0 | 0 | 0 |
| 18 | 21 | 1 | 0 | 0 | 0 | 0 |
| 22 | 23 | 1 | 0 | 0 | 0 | 0 |
| 22 | 24 | 1 | 0 | 0 | 0 | 0 |
| 22 | 25 | 1 | 0 | 0 | 0 | 0 |
| 23 | 26 | 2 | 0 | 0 | 0 | 0 |
| 24 | 27 | 2 | 0 | 0 | 0 | 0 |
| 25 | 28 | 2 | 0 | 0 | 0 | 0 |
| 29 | 30 | 1 | 0 | 0 | 0 | 0 |
| 29 | 31 | 1 | 0 | 0 | 0 | 0 |
| 29 | 32 | 1 | 0 | 0 | 0 | 0 |
| 30 | 33 | 2 | 0 | 0 | 0 | 0 |
| 31 | 34 | 3 | 0 | 0 | 0 | 0 |
| 32 | 35 | 2 | 0 | 0 | 0 | 0 |







|    |    |   |   |   |   |   |
|----|----|---|---|---|---|---|
| 17 | 30 | 3 | 0 | 0 | 0 | 0 |
| 18 | 31 | 4 | 0 | 0 | 0 | 0 |
| 18 | 32 | 1 | 0 | 0 | 0 | 0 |
| 20 | 31 | 4 | 0 | 0 | 0 | 0 |
| 20 | 33 | 1 | 0 | 0 | 0 | 0 |
| 22 | 34 | 1 | 0 | 0 | 0 | 0 |
| 25 | 35 | 4 | 0 | 0 | 0 | 0 |
| 25 | 36 | 1 | 0 | 0 | 0 | 0 |
| 27 | 35 | 4 | 0 | 0 | 0 | 0 |
| 27 | 37 | 1 | 0 | 0 | 0 | 0 |
| 31 | 38 | 1 | 0 | 0 | 0 | 0 |
| 35 | 39 | 1 | 0 | 0 | 0 | 0 |
| 40 | 41 | 1 | 0 | 0 | 0 | 0 |
| 40 | 42 | 1 | 0 | 0 | 0 | 0 |
| 40 | 43 | 1 | 0 | 0 | 0 | 0 |
| 41 | 44 | 3 | 0 | 0 | 0 | 0 |
| 42 | 45 | 3 | 0 | 0 | 0 | 0 |
| 43 | 46 | 3 | 0 | 0 | 0 | 0 |
| 47 | 48 | 1 | 0 | 0 | 0 | 0 |
| 47 | 49 | 1 | 0 | 0 | 0 | 0 |
| 47 | 50 | 1 | 0 | 0 | 0 | 0 |
| 47 | 51 | 1 | 0 | 0 | 0 | 0 |
| 48 | 52 | 1 | 0 | 0 | 0 | 0 |
| 48 | 53 | 1 | 0 | 0 | 0 | 0 |
| 48 | 54 | 2 | 0 | 0 | 0 | 0 |
| 52 | 55 | 1 | 0 | 0 | 0 | 0 |
| 52 | 56 | 1 | 0 | 0 | 0 | 0 |
| 52 | 57 | 1 | 0 | 0 | 0 | 0 |
| 53 | 58 | 4 | 0 | 0 | 0 | 0 |
| 53 | 59 | 4 | 0 | 0 | 0 | 0 |
| 58 | 60 | 4 | 0 | 0 | 0 | 0 |
| 58 | 61 | 1 | 0 | 0 | 0 | 0 |
| 59 | 62 | 4 | 0 | 0 | 0 | 0 |
| 59 | 63 | 1 | 0 | 0 | 0 | 0 |
| 60 | 64 | 4 | 0 | 0 | 0 | 0 |
| 60 | 65 | 1 | 0 | 0 | 0 | 0 |
| 62 | 64 | 4 | 0 | 0 | 0 | 0 |
| 62 | 66 | 1 | 0 | 0 | 0 | 0 |
| 64 | 67 | 1 | 0 | 0 | 0 | 0 |





|    |    |   |   |   |   |   |
|----|----|---|---|---|---|---|
| 19 | 29 | 1 | 0 | 0 | 0 | 0 |
| 22 | 30 | 4 | 0 | 0 | 0 | 0 |
| 22 | 31 | 1 | 0 | 0 | 0 | 0 |
| 24 | 30 | 4 | 0 | 0 | 0 | 0 |
| 24 | 32 | 1 | 0 | 0 | 0 | 0 |
| 26 | 33 | 1 | 0 | 0 | 0 | 0 |
| 30 | 34 | 1 | 0 | 0 | 0 | 0 |
| 35 | 36 | 1 | 0 | 0 | 0 | 0 |
| 35 | 37 | 1 | 0 | 0 | 0 | 0 |
| 36 | 38 | 3 | 0 | 0 | 0 | 0 |
| 37 | 39 | 3 | 0 | 0 | 0 | 0 |
| 40 | 41 | 1 | 0 | 0 | 0 | 0 |
| 40 | 42 | 1 | 0 | 0 | 0 | 0 |
| 40 | 43 | 1 | 0 | 0 | 0 | 0 |
| 41 | 44 | 3 | 0 | 0 | 0 | 0 |
| 42 | 45 | 3 | 0 | 0 | 0 | 0 |
| 43 | 46 | 3 | 0 | 0 | 0 | 0 |
| 47 | 48 | 1 | 0 | 0 | 0 | 0 |
| 47 | 49 | 1 | 0 | 0 | 0 | 0 |
| 47 | 50 | 1 | 0 | 0 | 0 | 0 |
| 47 | 51 | 1 | 0 | 0 | 0 | 0 |
| 48 | 52 | 1 | 0 | 0 | 0 | 0 |
| 48 | 53 | 1 | 0 | 0 | 0 | 0 |
| 48 | 54 | 2 | 0 | 0 | 0 | 0 |
| 52 | 55 | 1 | 0 | 0 | 0 | 0 |
| 52 | 56 | 1 | 0 | 0 | 0 | 0 |
| 52 | 57 | 1 | 0 | 0 | 0 | 0 |
| 53 | 58 | 4 | 0 | 0 | 0 | 0 |
| 53 | 59 | 4 | 0 | 0 | 0 | 0 |
| 58 | 60 | 4 | 0 | 0 | 0 | 0 |
| 58 | 61 | 1 | 0 | 0 | 0 | 0 |
| 59 | 62 | 4 | 0 | 0 | 0 | 0 |
| 59 | 63 | 1 | 0 | 0 | 0 | 0 |
| 60 | 64 | 4 | 0 | 0 | 0 | 0 |
| 60 | 65 | 1 | 0 | 0 | 0 | 0 |
| 62 | 64 | 4 | 0 | 0 | 0 | 0 |
| 62 | 66 | 1 | 0 | 0 | 0 | 0 |
| 64 | 67 | 1 | 0 | 0 | 0 | 0 |





|    |    |   |   |   |   |   |
|----|----|---|---|---|---|---|
| 17 | 30 | 2 | 0 | 0 | 0 | 0 |
| 18 | 31 | 4 | 0 | 0 | 0 | 0 |
| 18 | 32 | 1 | 0 | 0 | 0 | 0 |
| 20 | 31 | 4 | 0 | 0 | 0 | 0 |
| 20 | 33 | 1 | 0 | 0 | 0 | 0 |
| 22 | 34 | 1 | 0 | 0 | 0 | 0 |
| 25 | 35 | 4 | 0 | 0 | 0 | 0 |
| 25 | 36 | 1 | 0 | 0 | 0 | 0 |
| 27 | 35 | 4 | 0 | 0 | 0 | 0 |
| 27 | 37 | 1 | 0 | 0 | 0 | 0 |
| 31 | 38 | 1 | 0 | 0 | 0 | 0 |
| 35 | 39 | 1 | 0 | 0 | 0 | 0 |
| 40 | 41 | 1 | 0 | 0 | 0 | 0 |
| 40 | 42 | 2 | 0 | 0 | 0 | 0 |
| 41 | 43 | 1 | 0 | 0 | 0 | 0 |
| 41 | 44 | 1 | 0 | 0 | 0 | 0 |
| 43 | 45 | 2 | 0 | 0 | 0 | 0 |
| 44 | 46 | 2 | 0 | 0 | 0 | 0 |
| 47 | 48 | 1 | 0 | 0 | 0 | 0 |
| 47 | 49 | 1 | 0 | 0 | 0 | 0 |
| 47 | 50 | 1 | 0 | 0 | 0 | 0 |
| 47 | 51 | 1 | 0 | 0 | 0 | 0 |
| 48 | 52 | 1 | 0 | 0 | 0 | 0 |
| 48 | 53 | 1 | 0 | 0 | 0 | 0 |
| 48 | 54 | 2 | 0 | 0 | 0 | 0 |
| 52 | 55 | 1 | 0 | 0 | 0 | 0 |
| 52 | 56 | 1 | 0 | 0 | 0 | 0 |
| 52 | 57 | 1 | 0 | 0 | 0 | 0 |
| 53 | 58 | 4 | 0 | 0 | 0 | 0 |
| 53 | 59 | 4 | 0 | 0 | 0 | 0 |
| 58 | 60 | 4 | 0 | 0 | 0 | 0 |
| 58 | 61 | 1 | 0 | 0 | 0 | 0 |
| 59 | 62 | 4 | 0 | 0 | 0 | 0 |
| 59 | 63 | 1 | 0 | 0 | 0 | 0 |
| 60 | 64 | 4 | 0 | 0 | 0 | 0 |
| 60 | 65 | 1 | 0 | 0 | 0 | 0 |
| 62 | 64 | 4 | 0 | 0 | 0 | 0 |
| 62 | 66 | 1 | 0 | 0 | 0 | 0 |
| 64 | 67 | 1 | 0 | 0 | 0 | 0 |







|    |    |   |   |   |   |   |
|----|----|---|---|---|---|---|
| 17 | 30 | 2 | 0 | 0 | 0 | 0 |
| 18 | 31 | 4 | 0 | 0 | 0 | 0 |
| 18 | 32 | 1 | 0 | 0 | 0 | 0 |
| 20 | 31 | 4 | 0 | 0 | 0 | 0 |
| 20 | 33 | 1 | 0 | 0 | 0 | 0 |
| 22 | 34 | 1 | 0 | 0 | 0 | 0 |
| 25 | 35 | 4 | 0 | 0 | 0 | 0 |
| 25 | 36 | 1 | 0 | 0 | 0 | 0 |
| 27 | 35 | 4 | 0 | 0 | 0 | 0 |
| 27 | 37 | 1 | 0 | 0 | 0 | 0 |
| 31 | 38 | 1 | 0 | 0 | 0 | 0 |
| 35 | 39 | 1 | 0 | 0 | 0 | 0 |
| 40 | 41 | 1 | 0 | 0 | 0 | 0 |
| 40 | 42 | 1 | 0 | 0 | 0 | 0 |
| 40 | 43 | 1 | 0 | 0 | 0 | 0 |
| 41 | 44 | 2 | 0 | 0 | 0 | 0 |
| 42 | 45 | 2 | 0 | 0 | 0 | 0 |
| 43 | 46 | 2 | 0 | 0 | 0 | 0 |
| 47 | 48 | 1 | 0 | 0 | 0 | 0 |
| 47 | 49 | 1 | 0 | 0 | 0 | 0 |
| 47 | 50 | 1 | 0 | 0 | 0 | 0 |
| 47 | 51 | 1 | 0 | 0 | 0 | 0 |
| 48 | 52 | 1 | 0 | 0 | 0 | 0 |
| 48 | 53 | 1 | 0 | 0 | 0 | 0 |
| 48 | 54 | 2 | 0 | 0 | 0 | 0 |
| 52 | 55 | 1 | 0 | 0 | 0 | 0 |
| 52 | 56 | 1 | 0 | 0 | 0 | 0 |
| 52 | 57 | 1 | 0 | 0 | 0 | 0 |
| 53 | 58 | 4 | 0 | 0 | 0 | 0 |
| 53 | 59 | 4 | 0 | 0 | 0 | 0 |
| 58 | 60 | 4 | 0 | 0 | 0 | 0 |
| 58 | 61 | 1 | 0 | 0 | 0 | 0 |
| 59 | 62 | 4 | 0 | 0 | 0 | 0 |
| 59 | 63 | 1 | 0 | 0 | 0 | 0 |
| 60 | 64 | 4 | 0 | 0 | 0 | 0 |
| 60 | 65 | 1 | 0 | 0 | 0 | 0 |
| 62 | 64 | 4 | 0 | 0 | 0 | 0 |
| 62 | 66 | 1 | 0 | 0 | 0 | 0 |
| 64 | 67 | 1 | 0 | 0 | 0 | 0 |

Molecular coordinates of **3**

3, Fe2-Komplex, S2-Phosphanoxid-verbrueckt, P(OEt)3

Created by GaussView 5.0.8

```
58 56 0 0 0 0 0 0 0 0 0 0 0 0 0
  0.7755    2.1419    0.1464 P  0 0 0 0 0 0 0 0 0 0 0 0 0 0
  1.6001    0.0965    0.0372 Fe 0 0 0 0 0 0 0 0 0 0 0 0 0 0
-0.2571    2.5191    1.3623 O  0 0 0 0 0 0 0 0 0 0 0 0 0 0
  2.8319    0.3060   -1.2413 C  0 0 0 0 0 0 0 0 0 0 0 0 0 0
  2.8174    0.2333    1.3393 C  0 0 0 0 0 0 0 0 0 0 0 0 0 0
  1.7775    3.4289    0.3328 O  0 0 0 0 0 0 0 0 0 0 0 0 0 0
-0.1795    2.5428   -1.1041 O  0 0 0 0 0 0 0 0 0 0 0 0 0 0
  0.1815    2.5780    2.7434 C  0 0 0 0 0 0 0 0 0 0 0 0 0 0
  3.6206    0.4093   -2.0680 O  0 0 0 0 0 0 0 0 0 0 0 0 0 0
  3.6053    0.3080    2.1700 O  0 0 0 0 0 0 0 0 0 0 0 0 0 0
  3.1272    3.5352   -0.1748 C  0 0 0 0 0 0 0 0 0 0 0 0 0 0
-0.8461    3.8314   -1.2235 C  0 0 0 0 0 0 0 0 0 0 0 0 0 0
-0.9882    3.0383    3.5907 C  0 0 0 0 0 0 0 0 0 0 0 0 0 0
  0.5237    1.5844    3.0484 H  0 0 0 0 0 0 0 0 0 0 0 0 0 0
  1.0181    3.2776    2.8130 H  0 0 0 0 0 0 0 0 0 0 0 0 0 0
  3.1669    4.1243   -1.5745 C  0 0 0 0 0 0 0 0 0 0 0 0 0 0
  3.6408    4.1835    0.5373 H  0 0 0 0 0 0 0 0 0 0 0 0 0 0
  3.6085    2.5558   -0.1433 H  0 0 0 0 0 0 0 0 0 0 0 0 0 0
-1.3806    3.9539   -2.6363 C  0 0 0 0 0 0 0 0 0 0 0 0 0 0
-1.6471    3.8724   -0.4819 H  0 0 0 0 0 0 0 0 0 0 0 0 0 0
-0.1273    4.6219   -0.9967 H  0 0 0 0 0 0 0 0 0 0 0 0 0 0
-0.6825    3.0930    4.6392 H  0 0 0 0 0 0 0 0 0 0 0 0 0 0
-1.3288    4.0282    3.2791 H  0 0 0 0 0 0 0 0 0 0 0 0 0 0
-1.8264    2.3419    3.5164 H  0 0 0 0 0 0 0 0 0 0 0 0 0 0
  2.6868    5.1054   -1.5961 H  0 0 0 0 0 0 0 0 0 0 0 0 0 0
  2.6697    3.4734   -2.2972 H  0 0 0 0 0 0 0 0 0 0 0 0 0 0
  4.2068    4.2456   -1.8910 H  0 0 0 0 0 0 0 0 0 0 0 0 0 0
-1.8991    4.9101   -2.7514 H  0 0 0 0 0 0 0 0 0 0 0 0 0 0
-2.0879    3.1524   -2.8603 H  0 0 0 0 0 0 0 0 0 0 0 0 0 0
-0.5694    3.9113   -3.3660 H  0 0 0 0 0 0 0 0 0 0 0 0 0 0
  1.2197   -2.3897   -0.0629 Fe 0 0 0 0 0 0 0 0 0 0 0 0 0 0
  2.3768   -2.8704   -1.3573 C  0 0 0 0 0 0 0 0 0 0 0 0 0 0
  2.3458   -2.9497    1.2273 C  0 0 0 0 0 0 0 0 0 0 0 0 0 0
  0.1822   -3.8971   -0.1276 C  0 0 0 0 0 0 0 0 0 0 0 0 0 0
  3.1121   -3.1773   -2.1763 O  0 0 0 0 0 0 0 0 0 0 0 0 0 0
  3.0630   -3.3047    2.0432 O  0 0 0 0 0 0 0 0 0 0 0 0 0 0
-0.3224   -4.9155   -0.1652 O  0 0 0 0 0 0 0 0 0 0 0 0 0 0
-1.4745   -0.5654   -1.5090 C  0 0 0 0 0 0 0 0 0 0 0 0 0 0
-2.3726   -1.3236   -0.1084 P  0 0 0 0 0 0 0 0 0 0 0 0 0 0
-1.9280   -0.9629   -2.4200 H  0 0 0 0 0 0 0 0 0 0 0 0 0 0
-1.5939    0.5189   -1.5050 H  0 0 0 0 0 0 0 0 0 0 0 0 0 0
  0.3302   -0.9126   -1.6295 S  0 0 0 0 0 0 0 0 0 0 0 0 0 0
-1.5396   -0.6830    1.3900 C  0 0 0 0 0 0 0 0 0 0 0 0 0 0
-4.0218   -0.5252   -0.1075 C  0 0 0 0 0 0 0 0 0 0 0 0 0 0
```



|    |    |   |   |   |   |   |
|----|----|---|---|---|---|---|
| 38 | 42 | 1 | 0 | 0 | 0 | 0 |
| 39 | 43 | 1 | 0 | 0 | 0 | 0 |
| 39 | 44 | 1 | 0 | 0 | 0 | 0 |
| 39 | 45 | 2 | 0 | 0 | 0 | 0 |
| 43 | 46 | 1 | 0 | 0 | 0 | 0 |
| 43 | 47 | 1 | 0 | 0 | 0 | 0 |
| 43 | 48 | 1 | 0 | 0 | 0 | 0 |
| 44 | 49 | 4 | 0 | 0 | 0 | 0 |
| 44 | 50 | 4 | 0 | 0 | 0 | 0 |
| 49 | 51 | 4 | 0 | 0 | 0 | 0 |
| 49 | 52 | 1 | 0 | 0 | 0 | 0 |
| 50 | 53 | 4 | 0 | 0 | 0 | 0 |
| 50 | 54 | 1 | 0 | 0 | 0 | 0 |
| 51 | 55 | 4 | 0 | 0 | 0 | 0 |
| 51 | 56 | 1 | 0 | 0 | 0 | 0 |
| 53 | 55 | 4 | 0 | 0 | 0 | 0 |
| 53 | 57 | 1 | 0 | 0 | 0 | 0 |
| 55 | 58 | 1 | 0 | 0 | 0 | 0 |





|    |    |   |   |   |   |   |
|----|----|---|---|---|---|---|
| 39 | 42 | 4 | 0 | 0 | 0 | 0 |
| 39 | 43 | 1 | 0 | 0 | 0 | 0 |
| 40 | 44 | 1 | 0 | 0 | 0 | 0 |
| 40 | 45 | 4 | 0 | 0 | 0 | 0 |
| 42 | 46 | 4 | 0 | 0 | 0 | 0 |
| 42 | 47 | 1 | 0 | 0 | 0 | 0 |
| 44 | 48 | 1 | 0 | 0 | 0 | 0 |
| 44 | 49 | 1 | 0 | 0 | 0 | 0 |
| 44 | 50 | 2 | 0 | 0 | 0 | 0 |
| 45 | 46 | 4 | 0 | 0 | 0 | 0 |
| 45 | 51 | 1 | 0 | 0 | 0 | 0 |
| 46 | 52 | 1 | 0 | 0 | 0 | 0 |
| 48 | 53 | 1 | 0 | 0 | 0 | 0 |
| 48 | 54 | 1 | 0 | 0 | 0 | 0 |
| 48 | 55 | 1 | 0 | 0 | 0 | 0 |
| 49 | 56 | 1 | 0 | 0 | 0 | 0 |
| 49 | 57 | 1 | 0 | 0 | 0 | 0 |
| 49 | 58 | 1 | 0 | 0 | 0 | 0 |







|    |    |   |   |   |   |   |
|----|----|---|---|---|---|---|
| 37 | 41 | 1 | 0 | 0 | 0 | 0 |
| 37 | 42 | 1 | 0 | 0 | 0 | 0 |
| 37 | 43 | 2 | 0 | 0 | 0 | 0 |
| 38 | 39 | 4 | 0 | 0 | 0 | 0 |
| 38 | 44 | 1 | 0 | 0 | 0 | 0 |
| 39 | 45 | 1 | 0 | 0 | 0 | 0 |
| 41 | 46 | 1 | 0 | 0 | 0 | 0 |
| 41 | 47 | 1 | 0 | 0 | 0 | 0 |
| 41 | 48 | 1 | 0 | 0 | 0 | 0 |
| 42 | 49 | 1 | 0 | 0 | 0 | 0 |
| 42 | 50 | 1 | 0 | 0 | 0 | 0 |
| 42 | 51 | 1 | 0 | 0 | 0 | 0 |
| 52 | 53 | 1 | 0 | 0 | 0 | 0 |
| 52 | 54 | 1 | 0 | 0 | 0 | 0 |
| 52 | 55 | 1 | 0 | 0 | 0 | 0 |
| 53 | 56 | 2 | 0 | 0 | 0 | 0 |
| 54 | 57 | 2 | 0 | 0 | 0 | 0 |
| 55 | 58 | 2 | 0 | 0 | 0 | 0 |





|    |    |   |   |   |   |   |
|----|----|---|---|---|---|---|
| 38 | 42 | 1 | 0 | 0 | 0 | 0 |
| 39 | 43 | 1 | 0 | 0 | 0 | 0 |
| 39 | 44 | 1 | 0 | 0 | 0 | 0 |
| 39 | 45 | 2 | 0 | 0 | 0 | 0 |
| 43 | 46 | 1 | 0 | 0 | 0 | 0 |
| 43 | 47 | 1 | 0 | 0 | 0 | 0 |
| 43 | 48 | 1 | 0 | 0 | 0 | 0 |
| 44 | 49 | 4 | 0 | 0 | 0 | 0 |
| 44 | 50 | 4 | 0 | 0 | 0 | 0 |
| 49 | 51 | 4 | 0 | 0 | 0 | 0 |
| 49 | 52 | 1 | 0 | 0 | 0 | 0 |
| 50 | 53 | 4 | 0 | 0 | 0 | 0 |
| 50 | 54 | 1 | 0 | 0 | 0 | 0 |
| 51 | 55 | 4 | 0 | 0 | 0 | 0 |
| 51 | 56 | 1 | 0 | 0 | 0 | 0 |
| 53 | 55 | 4 | 0 | 0 | 0 | 0 |
| 53 | 57 | 1 | 0 | 0 | 0 | 0 |
| 55 | 58 | 1 | 0 | 0 | 0 | 0 |







|    |    |   |   |   |   |   |
|----|----|---|---|---|---|---|
| 31 | 42 | 1 | 0 | 0 | 0 | 0 |
| 31 | 43 | 1 | 0 | 0 | 0 | 0 |
| 31 | 44 | 1 | 0 | 0 | 0 | 0 |
| 34 | 45 | 1 | 0 | 0 | 0 | 0 |
| 34 | 46 | 1 | 0 | 0 | 0 | 0 |
| 34 | 47 | 1 | 0 | 0 | 0 | 0 |
| 37 | 48 | 1 | 0 | 0 | 0 | 0 |
| 37 | 49 | 1 | 0 | 0 | 0 | 0 |
| 37 | 50 | 1 | 0 | 0 | 0 | 0 |
| 40 | 51 | 4 | 0 | 0 | 0 | 0 |
| 40 | 52 | 1 | 0 | 0 | 0 | 0 |
| 41 | 53 | 4 | 0 | 0 | 0 | 0 |
| 41 | 54 | 1 | 0 | 0 | 0 | 0 |
| 51 | 55 | 4 | 0 | 0 | 0 | 0 |
| 51 | 56 | 1 | 0 | 0 | 0 | 0 |
| 53 | 55 | 4 | 0 | 0 | 0 | 0 |
| 53 | 57 | 1 | 0 | 0 | 0 | 0 |
| 55 | 58 | 1 | 0 | 0 | 0 | 0 |





























# Molecular coordinates of **6**

6-, Fe2-Komplex, S2-Phosphanoxid-verbrueckt, P(OMe)3

Created by GaussView 5.0.8

```

49 47 0 0 0 0 0 0 0 0 0 0 0 0 0
0.0708 2.5018 -0.0015 P 0 0 0 0 0 0 0 0 0 0 0 0 0 0 0
1.4748 0.8116 -0.0715 Fe 0 0 0 0 0 0 0 0 0 0 0 0 0 0 0
-0.8962 2.7627 1.3291 O 0 0 0 0 0 0 0 0 0 0 0 0 0 0 0
2.5847 1.2596 -1.3813 C 0 0 0 0 0 0 0 0 0 0 0 0 0 0 0
2.6657 1.2923 1.1509 C 0 0 0 0 0 0 0 0 0 0 0 0 0 0 0
0.6642 4.0660 -0.0414 O 0 0 0 0 0 0 0 0 0 0 0 0 0 0 0
-1.1520 2.6071 -1.1107 O 0 0 0 0 0 0 0 0 0 0 0 0 0 0 0
-0.2960 2.9661 2.6122 C 0 0 0 0 0 0 0 0 0 0 0 0 0 0 0
3.3096 1.5354 -2.2388 O 0 0 0 0 0 0 0 0 0 0 0 0 0 0 0
3.4453 1.6034 1.9477 O 0 0 0 0 0 0 0 0 0 0 0 0 0 0 0
1.8374 4.4046 -0.7825 C 0 0 0 0 0 0 0 0 0 0 0 0 0 0 0
-2.0564 3.7184 -1.1675 C 0 0 0 0 0 0 0 0 0 0 0 0 0 0 0
0.3536 2.1288 2.8801 H 0 0 0 0 0 0 0 0 0 0 0 0 0 0 0
0.2775 3.8973 2.6225 H 0 0 0 0 0 0 0 0 0 0 0 0 0 0 0
-1.1128 3.0343 3.3322 H 0 0 0 0 0 0 0 0 0 0 0 0 0 0 0
2.7095 3.8583 -0.4177 H 0 0 0 0 0 0 0 0 0 0 0 0 0 0 0
1.7145 4.2014 -1.8505 H 0 0 0 0 0 0 0 0 0 0 0 0 0 0 0
1.9944 5.4750 -0.6373 H 0 0 0 0 0 0 0 0 0 0 0 0 0 0 0
-1.5101 4.6547 -1.3034 H 0 0 0 0 0 0 0 0 0 0 0 0 0 0 0
-2.6485 3.7818 -0.2514 H 0 0 0 0 0 0 0 0 0 0 0 0 0 0 0
-2.7100 3.5449 -2.0231 H 0 0 0 0 0 0 0 0 0 0 0 0 0 0 0
1.7375 -1.9375 0.0009 Fe 0 0 0 0 0 0 0 0 0 0 0 0 0 0 0
2.9535 -2.1651 1.2821 C 0 0 0 0 0 0 0 0 0 0 0 0 0 0 0
2.9833 -2.1842 -1.2492 C 0 0 0 0 0 0 0 0 0 0 0 0 0 0 0
0.9503 -3.6130 0.0207 C 0 0 0 0 0 0 0 0 0 0 0 0 0 0 0
3.7342 -2.3215 2.1158 O 0 0 0 0 0 0 0 0 0 0 0 0 0 0 0
3.7845 -2.3561 -2.0602 O 0 0 0 0 0 0 0 0 0 0 0 0 0 0 0
0.7028 -4.7330 0.0277 O 0 0 0 0 0 0 0 0 0 0 0 0 0 0 0
-1.2771 -0.7589 -1.5105 C 0 0 0 0 0 0 0 0 0 0 0 0 0 0 0
-2.0066 -1.5313 -0.0201 P 0 0 0 0 0 0 0 0 0 0 0 0 0 0 0
-1.6528 -1.3464 -2.3527 H 0 0 0 0 0 0 0 0 0 0 0 0 0 0 0
-1.6428 0.2648 -1.6088 H 0 0 0 0 0 0 0 0 0 0 0 0 0 0 0
0.5630 -0.6981 -1.6533 S 0 0 0 0 0 0 0 0 0 0 0 0 0 0 0
-1.2851 -0.6928 1.4411 C 0 0 0 0 0 0 0 0 0 0 0 0 0 0 0
-3.7618 -0.9491 -0.0315 C 0 0 0 0 0 0 0 0 0 0 0 0 0 0 0
-1.9693 -3.0320 0.0160 O 0 0 0 0 0 0 0 0 0 0 0 0 0 0 0
-1.6623 -1.2476 2.3046 H 0 0 0 0 0 0 0 0 0 0 0 0 0 0 0
-1.6672 0.3285 1.4969 H 0 0 0 0 0 0 0 0 0 0 0 0 0 0 0
0.5545 -0.6147 1.5935 S 0 0 0 0 0 0 0 0 0 0 0 0 0 0 0
-4.1310 0.4016 -0.0581 C 0 0 0 0 0 0 0 0 0 0 0 0 0 0 0
-4.7589 -1.9295 -0.0091 C 0 0 0 0 0 0 0 0 0 0 0 0 0 0 0
-5.4765 0.7622 -0.0612 C 0 0 0 0 0 0 0 0 0 0 0 0 0 0 0
-3.3707 1.1745 -0.0769 H 0 0 0 0 0 0 0 0 0 0 0 0 0 0 0
-6.1046 -1.5667 -0.0132 C 0 0 0 0 0 0 0 0 0 0 0 0 0 0 0
    
```





### Molecular coordinates of **6<sup>2-</sup>**

62-, Fe2-Komplex, S2-Phosphanoxid-verbrueckt, P(OMe)3

Created by GaussView 5.0.8

```

49 47 0 0 0 0 0 0 0 0 0 0
-1.3065 2.2071 -0.2784 P 0 0 0 0 0 0 0 0 0 0 0 0
 0.6305 1.5781 0.2348 Fe 0 0 0 0 0 0 0 0 0 0 0 0
-1.6185 3.8830 -0.2804 O 0 0 0 0 0 0 0 0 0 0 0 0
 1.8958 2.5349 -0.5259 C 0 0 0 0 0 0 0 0 0 0 0 0
 0.6897 2.5424 1.6975 C 0 0 0 0 0 0 0 0 0 0 0 0
-2.7725 1.9300 0.5789 O 0 0 0 0 0 0 0 0 0 0 0 0
-1.9761 1.8049 -1.7532 O 0 0 0 0 0 0 0 0 0 0 0 0
-0.6063 4.7842 -0.7108 C 0 0 0 0 0 0 0 0 0 0 0 0
 2.6668 3.2439 -1.0384 O 0 0 0 0 0 0 0 0 0 0 0 0
 0.7557 3.1608 2.6847 O 0 0 0 0 0 0 0 0 0 0 0 0
-2.7710 2.1508 1.9779 C 0 0 0 0 0 0 0 0 0 0 0 0
-3.2349 2.2960 -2.1949 C 0 0 0 0 0 0 0 0 0 0 0 0
-0.2302 4.5359 -1.7091 H 0 0 0 0 0 0 0 0 0 0 0 0
-1.0655 5.7785 -0.7368 H 0 0 0 0 0 0 0 0 0 0 0 0
 0.2435 4.7953 -0.0241 H 0 0 0 0 0 0 0 0 0 0 0 0
-1.8869 1.7103 2.4538 H 0 0 0 0 0 0 0 0 0 0 0 0
-2.7918 3.2231 2.2086 H 0 0 0 0 0 0 0 0 0 0 0 0
-3.6686 1.6786 2.3892 H 0 0 0 0 0 0 0 0 0 0 0 0
-4.0531 1.8684 -1.6075 H 0 0 0 0 0 0 0 0 0 0 0 0
-3.2823 3.3871 -2.1166 H 0 0 0 0 0 0 0 0 0 0 0 0
-3.3422 1.9990 -3.2417 H 0 0 0 0 0 0 0 0 0 0 0 0
-3.4782 -1.2876 0.1961 C 0 0 0 0 0 0 0 0 0 0 0 0
-4.8600 -1.4643 0.2657 C 0 0 0 0 0 0 0 0 0 0 0 0
-2.6310 -2.3916 0.0381 C 0 0 0 0 0 0 0 0 0 0 0 0
-3.0773 -0.2820 0.2646 H 0 0 0 0 0 0 0 0 0 0 0 0
-5.4150 -2.7410 0.1787 C 0 0 0 0 0 0 0 0 0 0 0 0
-5.5010 -0.5961 0.3865 H 0 0 0 0 0 0 0 0 0 0 0 0
-0.7697 -2.2948 -0.0737 P 0 0 0 0 0 0 0 0 0 0 0 0
-3.1962 -3.6693 -0.0495 C 0 0 0 0 0 0 0 0 0 0 0 0
-4.5775 -3.8444 0.0207 C 0 0 0 0 0 0 0 0 0 0 0 0
-6.4920 -2.8739 0.2327 H 0 0 0 0 0 0 0 0 0 0 0 0
-0.4609 -1.1768 -1.5067 C 0 0 0 0 0 0 0 0 0 0 0 0
-0.2893 -1.4867 1.5240 C 0 0 0 0 0 0 0 0 0 0 0 0
-0.2777 -3.7087 -0.2554 O 0 0 0 0 0 0 0 0 0 0 0 0
-2.5223 -4.5104 -0.1736 H 0 0 0 0 0 0 0 0 0 0 0 0
-5.0004 -4.8430 -0.0486 H 0 0 0 0 0 0 0 0 0 0 0 0
-0.3377 -1.8747 -2.3405 H 0 0 0 0 0 0 0 0 0 0 0 0
-1.3426 -0.5623 -1.6957 H 0 0 0 0 0 0 0 0 0 0 0 0
 1.0213 -0.0745 -1.4711 S 0 0 0 0 0 0 0 0 0 0 0 0
-0.0775 -2.3390 2.1774 H 0 0 0 0 0 0 0 0 0 0 0 0
 1.1579 -0.3337 1.5935 S 0 0 0 0 0 0 0 0 0 0 0 0
-1.1610 -0.9596 1.9178 H 0 0 0 0 0 0 0 0 0 0 0 0
 2.6723 -1.1836 -0.0583 Fe 0 0 0 0 0 0 0 0 0 0 0 0
 3.4492 -1.8542 -1.4857 C 0 0 0 0 0 0 0 0 0 0 0 0

```













|    |    |   |   |   |   |   |
|----|----|---|---|---|---|---|
| 7  | 13 | 4 | 0 | 0 | 0 | 0 |
| 12 | 14 | 4 | 0 | 0 | 0 | 0 |
| 12 | 15 | 1 | 0 | 0 | 0 | 0 |
| 13 | 16 | 4 | 0 | 0 | 0 | 0 |
| 13 | 17 | 1 | 0 | 0 | 0 | 0 |
| 14 | 18 | 4 | 0 | 0 | 0 | 0 |
| 14 | 19 | 1 | 0 | 0 | 0 | 0 |
| 16 | 18 | 4 | 0 | 0 | 0 | 0 |
| 16 | 20 | 1 | 0 | 0 | 0 | 0 |
| 18 | 21 | 1 | 0 | 0 | 0 | 0 |
| 22 | 23 | 1 | 0 | 0 | 0 | 0 |
| 22 | 24 | 1 | 0 | 0 | 0 | 0 |
| 22 | 25 | 1 | 0 | 0 | 0 | 0 |
| 23 | 26 | 3 | 0 | 0 | 0 | 0 |
| 24 | 27 | 3 | 0 | 0 | 0 | 0 |
| 25 | 28 | 3 | 0 | 0 | 0 | 0 |
| 29 | 30 | 1 | 0 | 0 | 0 | 0 |
| 29 | 31 | 1 | 0 | 0 | 0 | 0 |
| 30 | 32 | 3 | 0 | 0 | 0 | 0 |
| 31 | 33 | 3 | 0 | 0 | 0 | 0 |





|    |    |   |   |   |   |   |
|----|----|---|---|---|---|---|
| 7  | 14 | 2 | 0 | 0 | 0 | 0 |
| 8  | 15 | 1 | 0 | 0 | 0 | 0 |
| 9  | 16 | 2 | 0 | 0 | 0 | 0 |
| 10 | 17 | 1 | 0 | 0 | 0 | 0 |
| 10 | 18 | 1 | 0 | 0 | 0 | 0 |
| 10 | 19 | 1 | 0 | 0 | 0 | 0 |
| 15 | 17 | 1 | 0 | 0 | 0 | 0 |
| 15 | 20 | 1 | 0 | 0 | 0 | 0 |
| 15 | 21 | 1 | 0 | 0 | 0 | 0 |
| 17 | 22 | 1 | 0 | 0 | 0 | 0 |
| 17 | 23 | 2 | 0 | 0 | 0 | 0 |
| 22 | 24 | 4 | 0 | 0 | 0 | 0 |
| 22 | 25 | 4 | 0 | 0 | 0 | 0 |
| 24 | 26 | 4 | 0 | 0 | 0 | 0 |
| 24 | 27 | 1 | 0 | 0 | 0 | 0 |
| 25 | 28 | 4 | 0 | 0 | 0 | 0 |
| 25 | 29 | 1 | 0 | 0 | 0 | 0 |
| 26 | 30 | 4 | 0 | 0 | 0 | 0 |
| 26 | 31 | 1 | 0 | 0 | 0 | 0 |
| 28 | 30 | 4 | 0 | 0 | 0 | 0 |
| 28 | 32 | 1 | 0 | 0 | 0 | 0 |
| 30 | 33 | 1 | 0 | 0 | 0 | 0 |





|    |    |   |   |   |   |   |
|----|----|---|---|---|---|---|
| 36 | 39 | 2 | 0 | 0 | 0 | 0 |
| 40 | 41 | 1 | 0 | 0 | 0 | 0 |
| 40 | 42 | 1 | 0 | 0 | 0 | 0 |
| 40 | 43 | 1 | 0 | 0 | 0 | 0 |
| 40 | 44 | 1 | 0 | 0 | 0 | 0 |
| 41 | 45 | 1 | 0 | 0 | 0 | 0 |
| 41 | 46 | 1 | 0 | 0 | 0 | 0 |
| 41 | 47 | 2 | 0 | 0 | 0 | 0 |
| 45 | 48 | 1 | 0 | 0 | 0 | 0 |
| 45 | 49 | 1 | 0 | 0 | 0 | 0 |
| 45 | 50 | 1 | 0 | 0 | 0 | 0 |
| 46 | 51 | 4 | 0 | 0 | 0 | 0 |
| 46 | 52 | 4 | 0 | 0 | 0 | 0 |
| 51 | 53 | 4 | 0 | 0 | 0 | 0 |
| 51 | 54 | 1 | 0 | 0 | 0 | 0 |
| 52 | 55 | 4 | 0 | 0 | 0 | 0 |
| 52 | 56 | 1 | 0 | 0 | 0 | 0 |
| 53 | 57 | 4 | 0 | 0 | 0 | 0 |
| 53 | 58 | 1 | 0 | 0 | 0 | 0 |
| 55 | 57 | 4 | 0 | 0 | 0 | 0 |
| 55 | 59 | 1 | 0 | 0 | 0 | 0 |
| 57 | 60 | 1 | 0 | 0 | 0 | 0 |





|    |    |   |   |   |   |   |
|----|----|---|---|---|---|---|
| 35 | 39 | 4 | 0 | 0 | 0 | 0 |
| 35 | 40 | 1 | 0 | 0 | 0 | 0 |
| 37 | 41 | 1 | 0 | 0 | 0 | 0 |
| 37 | 42 | 1 | 0 | 0 | 0 | 0 |
| 37 | 43 | 2 | 0 | 0 | 0 | 0 |
| 38 | 39 | 4 | 0 | 0 | 0 | 0 |
| 38 | 44 | 1 | 0 | 0 | 0 | 0 |
| 39 | 45 | 1 | 0 | 0 | 0 | 0 |
| 41 | 46 | 1 | 0 | 0 | 0 | 0 |
| 41 | 47 | 1 | 0 | 0 | 0 | 0 |
| 41 | 48 | 1 | 0 | 0 | 0 | 0 |
| 42 | 49 | 1 | 0 | 0 | 0 | 0 |
| 42 | 50 | 1 | 0 | 0 | 0 | 0 |
| 42 | 51 | 1 | 0 | 0 | 0 | 0 |
| 52 | 53 | 1 | 0 | 0 | 0 | 0 |
| 52 | 54 | 1 | 0 | 0 | 0 | 0 |
| 52 | 55 | 1 | 0 | 0 | 0 | 0 |
| 52 | 56 | 1 | 0 | 0 | 0 | 0 |
| 53 | 57 | 2 | 0 | 0 | 0 | 0 |
| 54 | 58 | 2 | 0 | 0 | 0 | 0 |
| 55 | 59 | 3 | 0 | 0 | 0 | 0 |
| 56 | 60 | 3 | 0 | 0 | 0 | 0 |







|    |    |   |   |   |   |   |
|----|----|---|---|---|---|---|
| 36 | 39 | 3 | 0 | 0 | 0 | 0 |
| 40 | 41 | 1 | 0 | 0 | 0 | 0 |
| 40 | 42 | 1 | 0 | 0 | 0 | 0 |
| 40 | 43 | 1 | 0 | 0 | 0 | 0 |
| 40 | 44 | 1 | 0 | 0 | 0 | 0 |
| 41 | 45 | 1 | 0 | 0 | 0 | 0 |
| 41 | 46 | 1 | 0 | 0 | 0 | 0 |
| 41 | 47 | 2 | 0 | 0 | 0 | 0 |
| 45 | 48 | 1 | 0 | 0 | 0 | 0 |
| 45 | 49 | 1 | 0 | 0 | 0 | 0 |
| 45 | 50 | 1 | 0 | 0 | 0 | 0 |
| 46 | 51 | 4 | 0 | 0 | 0 | 0 |
| 46 | 52 | 4 | 0 | 0 | 0 | 0 |
| 51 | 53 | 4 | 0 | 0 | 0 | 0 |
| 51 | 54 | 1 | 0 | 0 | 0 | 0 |
| 52 | 55 | 4 | 0 | 0 | 0 | 0 |
| 52 | 56 | 1 | 0 | 0 | 0 | 0 |
| 53 | 57 | 4 | 0 | 0 | 0 | 0 |
| 53 | 58 | 1 | 0 | 0 | 0 | 0 |
| 55 | 57 | 4 | 0 | 0 | 0 | 0 |
| 55 | 59 | 1 | 0 | 0 | 0 | 0 |
| 57 | 60 | 1 | 0 | 0 | 0 | 0 |





|    |    |   |   |   |   |   |
|----|----|---|---|---|---|---|
| 36 | 39 | 3 | 0 | 0 | 0 | 0 |
| 40 | 41 | 1 | 0 | 0 | 0 | 0 |
| 40 | 42 | 1 | 0 | 0 | 0 | 0 |
| 40 | 43 | 1 | 0 | 0 | 0 | 0 |
| 40 | 44 | 1 | 0 | 0 | 0 | 0 |
| 41 | 45 | 1 | 0 | 0 | 0 | 0 |
| 41 | 46 | 1 | 0 | 0 | 0 | 0 |
| 41 | 47 | 2 | 0 | 0 | 0 | 0 |
| 45 | 48 | 1 | 0 | 0 | 0 | 0 |
| 45 | 49 | 1 | 0 | 0 | 0 | 0 |
| 45 | 50 | 1 | 0 | 0 | 0 | 0 |
| 46 | 51 | 4 | 0 | 0 | 0 | 0 |
| 46 | 52 | 4 | 0 | 0 | 0 | 0 |
| 51 | 53 | 4 | 0 | 0 | 0 | 0 |
| 51 | 54 | 1 | 0 | 0 | 0 | 0 |
| 52 | 55 | 4 | 0 | 0 | 0 | 0 |
| 52 | 56 | 1 | 0 | 0 | 0 | 0 |
| 53 | 57 | 4 | 0 | 0 | 0 | 0 |
| 53 | 58 | 1 | 0 | 0 | 0 | 0 |
| 55 | 57 | 4 | 0 | 0 | 0 | 0 |
| 55 | 59 | 1 | 0 | 0 | 0 | 0 |
| 57 | 60 | 1 | 0 | 0 | 0 | 0 |







|    |    |   |   |   |   |   |
|----|----|---|---|---|---|---|
| 33 | 38 | 4 | 0 | 0 | 0 | 0 |
| 35 | 39 | 4 | 0 | 0 | 0 | 0 |
| 35 | 40 | 1 | 0 | 0 | 0 | 0 |
| 37 | 41 | 1 | 0 | 0 | 0 | 0 |
| 37 | 42 | 1 | 0 | 0 | 0 | 0 |
| 37 | 43 | 2 | 0 | 0 | 0 | 0 |
| 38 | 39 | 4 | 0 | 0 | 0 | 0 |
| 38 | 44 | 1 | 0 | 0 | 0 | 0 |
| 39 | 45 | 1 | 0 | 0 | 0 | 0 |
| 41 | 46 | 1 | 0 | 0 | 0 | 0 |
| 41 | 47 | 1 | 0 | 0 | 0 | 0 |
| 41 | 48 | 1 | 0 | 0 | 0 | 0 |
| 42 | 49 | 1 | 0 | 0 | 0 | 0 |
| 42 | 50 | 1 | 0 | 0 | 0 | 0 |
| 42 | 51 | 1 | 0 | 0 | 0 | 0 |
| 52 | 53 | 1 | 0 | 0 | 0 | 0 |
| 52 | 54 | 1 | 0 | 0 | 0 | 0 |
| 52 | 55 | 1 | 0 | 0 | 0 | 0 |
| 52 | 56 | 1 | 0 | 0 | 0 | 0 |
| 53 | 57 | 3 | 0 | 0 | 0 | 0 |
| 54 | 58 | 3 | 0 | 0 | 0 | 0 |
| 55 | 59 | 3 | 0 | 0 | 0 | 0 |
| 56 | 60 | 3 | 0 | 0 | 0 | 0 |
